# Supplementary material
Source: Springer Nature journal article supplement (https://www.springermedizin.de/resource/supplementary/12936_2008_663_MOESM2_ESM.pdf/9547946)

■ *An. gambiae* M form

□ *An. gambiae* S form

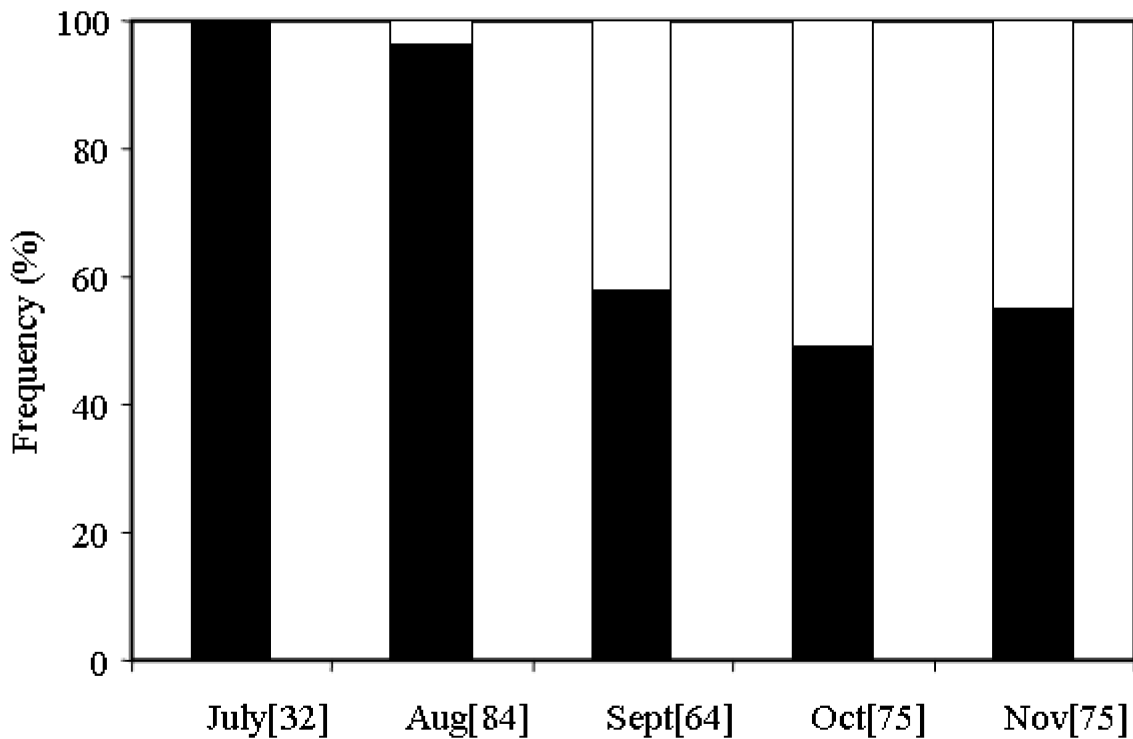

Supplement: MOESM2 [file 9547946]
